# Supplementary material for: Construction of a redox-responsive drug delivery system utilizing the volume of AS1411 spatial configuration gating mesoporous silica pores
Source: Royal Society of Chemistry journal article supplement (doi:10.1039/d2na00446a), 2022-01-01
Supplement: d2na00446a2.pdf [file d2na00446a2.pdf]

**Electronic Supplementary Information (ESI)**

**Construction of a redox-responsive drug delivery system  
utilizing the volume of AS1411 spatial configuration gating  
mesoporous silica pore**

**Lu Zhou <sup>a</sup>, Yajie Zhang <sup>b</sup> and Yong Ma <sup>\*a</sup>**

<sup>a</sup> Department of Chemistry, School of Forensic Medicine, China  
Medical University, Shenyang 110122, China

<sup>b</sup> Department of gastroenterology, Shengjing Hospital of China  
Medical University, Shenyang 110004, China

\* Corresponding author. E-mail: yma10@cmu.edu.cn

## Figures

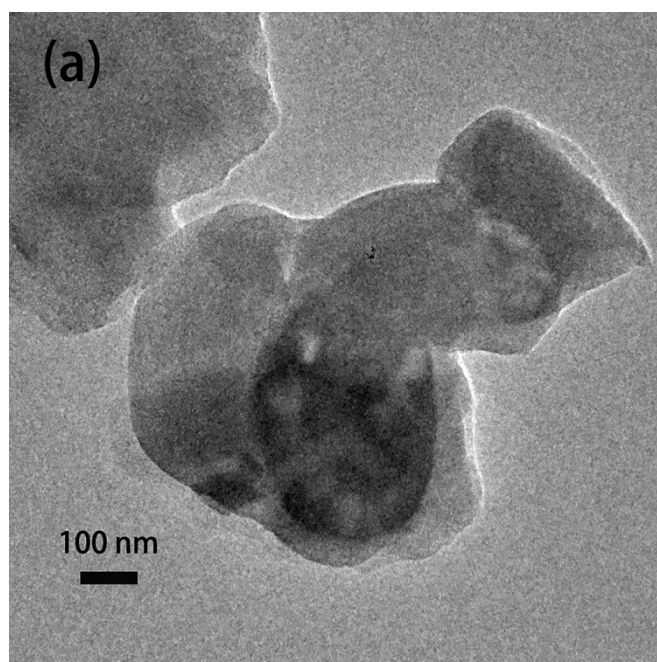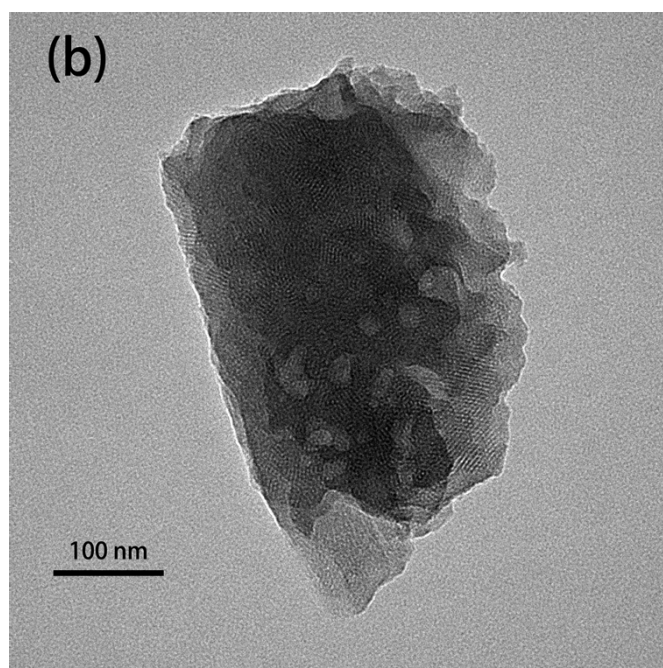

**Figure S1.** TEM images of (a) MCM-41; (b) MCM-41-SS-AS1411
