# Supplementary figures and images for: Construction of a redox-responsive drug delivery system utilizing the volume of AS1411 spatial configuration gating mesoporous silica pores
Source: Royal Society of Chemistry journal article supplement (doi:10.1039/d2na00446a), 2022-01-01

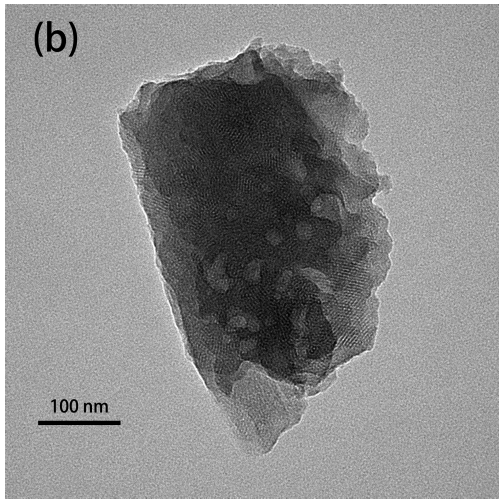

Supplement: d2na00446a4.pdf [file d2na00446a4.pdf]
