# Supplementary figures and images for: Construction of a redox-responsive drug delivery system utilizing the volume of AS1411 spatial configuration gating mesoporous silica pores
Source: PubMed Central journal article supplement — Nanoscale Adv. 2022 Aug 19;4(19):4059–65. doi: 10.1039/d2na00446a (PMC9514570; doi:10.1039/d2na00446a), 2022-08-19

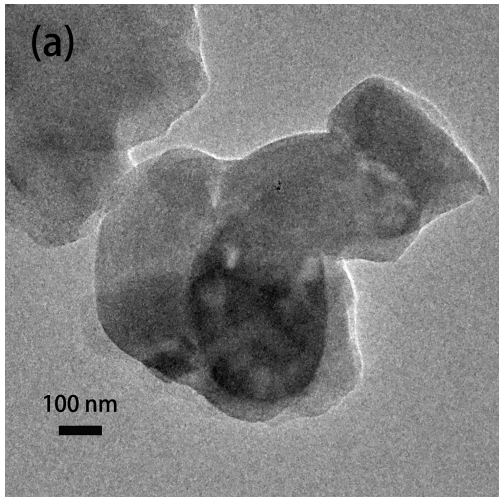

Supplement: NA-004-D2NA00446A-s003.pdf [file NA-004-D2NA00446A-s003.pdf]
